# Supplementary material for: Rediscovering Tomkins’ polarity theory: Humanism, normativism, and the psychological basis of left-right ideological conflict in the U.S. and Sweden
Source: PubMed Central journal article supplement (PMC7394437; doi:10.1371/journal.pone.0236627), 2020-07-31
Supplement: pone.0236627.s003.pdf [file pone.0236627.s003.pdf]

## **Indirect relations**

Indirect relations based on all structural equation models we tested (calculated in AMOS 25.0) are reported in the supplementary tables below. We report unstandardized indirect relations with 95% bias-corrected bootstrap confidence intervals (20000 resamples) and *p*-values. We report total indirect relations (i.e., the sum of all paths that run through a given mediator from predictor to outcome).

**Supplementary Table 1. Indirect relations based on the model of ideology as motivated social cognition.**

|                 | Unstandardized indirect effect         |                                        |                                        |
|-----------------|----------------------------------------|----------------------------------------|----------------------------------------|
|                 | Study 1                                | Study 2                                | Study 4                                |
| HUM → SJ → PFE  | .034[-.014, .130]<br><i>p</i> = .16    | .032[-.006, .088]<br><i>p</i> = .090   | .034[-.040, .176]<br><i>p</i> = .36    |
| HUM → SJ → RES  | -.021[-.120, .009]<br><i>p</i> = .19   | -.022[-.082, .003]<br><i>p</i> = .093  | -.034[-.172, .042]<br><i>p</i> = .37   |
| HUM → SJ → LR   | -.019[-.109, .009]<br><i>p</i> = .18   | -.030[-.100, .006]<br><i>p</i> = .10   | -.084[-.334, .124]<br><i>p</i> = .45   |
| HUM → PFE → LR  | -.128[-.318, -.001]<br><i>p</i> = .046 | -.175[-.397, .028]<br><i>p</i> = .085  | -.534[-1.19, -.218]<br><i>p</i> = .003 |
| HUM → RES → LR  | -.071[-.222, .065]<br><i>p</i> = .28   | -.277[-.487, -.130]<br><i>p</i> < .001 | -.007[-.102, .030]<br><i>p</i> = .50   |
| NORM → SJ → PFE | -.044[-.159, .003]<br><i>p</i> = .068  | -.161[-.359, -.064]<br><i>p</i> < .001 | -.238[-.530, -.075]<br><i>p</i> = .002 |
| NORM → SJ → RES | .027[-.008, .135]<br><i>p</i> = .15    | .107[.010, .293]<br><i>p</i> = .029    | .243[.083, .466]<br><i>p</i> = .008    |
| NORM → SJ → LR  | .025[-.007, .136]<br><i>p</i> = .15    | .151[.048, .364]<br><i>p</i> = .001    | .599[.356, .957]<br><i>p</i> < .001    |
| NORM → PFE → LR | .093[.006, .227]<br><i>p</i> = .036    | .111[-.004, .318]<br><i>p</i> = .057   | .249[.075, .559]<br><i>p</i> = .003    |
| NORM → RES → LR | .207[.073, .402]<br><i>p</i> = .001    | 1.34[.936, 2.06]<br><i>p</i> < .001    | .124[-.126, .397]<br><i>p</i> = .23    |

*Note.* HUM = Humanism; NORM = Normativism; SJ = General system justification; PFE = Preference for equality; RES = Resistance to change; LR = Left-right self-placement.

**Supplementary Table 2. Indirect relations based on the dual-process model of ideology.**

|                  | Unstandardized indirect effect         |                                        |                                        |
|------------------|----------------------------------------|----------------------------------------|----------------------------------------|
|                  | Study 1                                | Study 2                                | Study 3                                |
| HUM → CWB → SDO  | -.269[-.420, -.158]<br><i>p</i> < .001 | -.340[-.565, -.053]<br><i>p</i> = .026 | -.069[-.197, .009]<br><i>p</i> = .084  |
| HUM → DWB → SDO  | -.009[-.024, .000]<br><i>p</i> = .051  | -.008[-.033, .005]<br><i>p</i> = .24   | -.002[-.023, .005]<br><i>p</i> = .46   |
| HUM → CWB → RWA  | -.027[-.055, -.008]<br><i>p</i> = .006 | -.031[-.096, .050]<br><i>p</i> = .35   | -.006[-.032, .002]<br><i>p</i> = .15   |
| HUM → DWB → RWA  | -.101[-.178, -.046]<br><i>p</i> < .001 | -.096[-.222, .000]<br><i>p</i> = .050  | -.028[-.148, .067]<br><i>p</i> = .57   |
| HUM → SDO → LR   | -.449[-.683, -.259]<br><i>p</i> < .001 | -.253[-.445, -.131]<br><i>p</i> = .001 | -.319[-.741, -.050]<br><i>p</i> = .021 |
| HUM → RWA → LR   | -.418[-.681, -.234]<br><i>p</i> < .001 | -.335[-.627, -.134]<br><i>p</i> < .001 | -.073[-.604, .278]<br><i>p</i> = .65   |
| HUM → CWB → LR   | -.182[-.315, -.092]<br><i>p</i> < .001 | .090[-.023, .520]<br><i>p</i> = .13    | -.174[-.499, .019]<br><i>p</i> = .077  |
| HUM → DWB → LR   | -.094[-.174, -.041]<br><i>p</i> < .001 | -.051[-.129, .004]<br><i>p</i> = .063  | .007[-.024, .123]<br><i>p</i> = .42    |
| NORM → CWB → SDO | .272[.165, .423]<br><i>p</i> < .001    | .325[.080, .571]<br><i>p</i> = .023    | .378[.191, .652]<br><i>p</i> = .001    |
| NORM → DWB → SDO | .013[-.001, .031]<br><i>p</i> = .060   | .048[-.010, .173]<br><i>p</i> = .11    | .033[-.006, .082]<br><i>p</i> = .092   |
| NORM → CWB → RWA | .027[.008, .055]<br><i>p</i> = .005    | .030[-.068, .093]<br><i>p</i> = .34    | .035[-.025, .093]<br><i>p</i> = .22    |
| NORM → DWB → RWA | .142[.083, .223]<br><i>p</i> < .001    | .535[.193, 1.01]<br><i>p</i> < .001    | .394[.283, .567]<br><i>p</i> < .001    |
| NORM → SDO → LR  | .194[.100, .328]<br><i>p</i> < .001    | .216[.098, .499]<br><i>p</i> = .001    | .563[.046, 1.20]<br><i>p</i> = .033    |
| NORM → RWA → LR  | .314[.176, .501]<br><i>p</i> < .001    | 1.05[.307, 1.94]<br><i>p</i> < .001    | 1.54[.710, 3.04]<br><i>p</i> = .001    |
| NORM → CWB → LR  | .185[.095, .315]<br><i>p</i> < .001    | -.085[-.596, .022]<br><i>p</i> = .14   | .951[.437, 1.69]<br><i>p</i> = .001    |
| NORM → DWB → LR  | .132[.073, .216]<br><i>p</i> < .001    | .286[.127, .619]<br><i>p</i> < .001    | -.101[-.512, .228]<br><i>p</i> = .56   |

*Note.* HUM = Humanism; NORM = Normativism; CWB = Competitive-world beliefs; DWB = Dangerous-world beliefs; SDO = Social dominance orientation; RWA = Right-wing authoritarianism; LR = Left-right self-placement.

**Supplementary Table 3. Indirect relations based on the model incorporating HEXACO personality traits.**

|                | Unstandardized Indirect effect<br>Study 4 |
|----------------|-------------------------------------------|
| HUM → O → SJ   | .001[-.122, .086]<br><i>p</i> = .94       |
| HUM → E → SJ   | -.147[-.365, -.020]<br><i>p</i> = .025    |
| HUM → H → SJ   | -.088[-.250, -.014]<br><i>p</i> = .021    |
| HUM → O → PFE  | -.001[-.086, .072]<br><i>p</i> = .93      |
| HUM → E → PFE  | .156[.051, .334]<br><i>p</i> = .006       |
| HUM → H → PFE  | .033[-.021, .168]<br><i>p</i> = .20       |
| HUM → O → RES  | .000[-.089, .082]<br><i>p</i> = .92       |
| HUM → E → RES  | .006[-.144, .150]<br><i>p</i> = .96       |
| HUM → H → RES  | -.082[-.258, -.013]<br><i>p</i> = .012    |
| HUM → O → LR   | .003[-.119, .085]<br><i>p</i> = .90       |
| HUM → E → LR   | -.071[-.268, .078]<br><i>p</i> = .29      |
| HUM → H → LR   | -.113[-.302, -.022]<br><i>p</i> = .016    |
| NORM → O → SJ  | .137[.046, .295]<br><i>p</i> = .005       |
| NORM → E → SJ  | -.051[-.222, .007]<br><i>p</i> = .10      |
| NORM → H → SJ  | .098[.026, .247]<br><i>p</i> = .013       |
| NORM → O → PFE | -.094[-.274, -.010]<br><i>p</i> = .025    |
| NORM → E → PFE | .054[-.007, .187]<br><i>p</i> = .084      |
| NORM → H → PFE | -.037[-.162, .024]<br><i>p</i> = .20      |
| NORM → O → RES | .097[-.005, .253]                         |

Supplement to *Rediscovering Tomkins' Polarity Theory: Humanism, Normativism, and the Bipolar Structure of Left-Right ideology in the U.S. and Sweden*

---

|                |                                 |
|----------------|---------------------------------|
|                | $p = .058$                      |
| NORM → E → RES | .002[-.052, .066]<br>$p = .79$  |
| NORM → H → RES | .092[.025, .260]<br>$p = .006$  |
| NORM → O → LR  | .125[.022, .299]<br>$p = .020$  |
| NORM → E → LR  | -.031[-.168, .007]<br>$p = .11$ |
| NORM → H → LR  | .123[.040, .290]<br>$p = .010$  |

---

*Note.* HUM = Humanism; NORM = Normativism; SJ = General system justification; PFE = Preference for equality; RES = Resistance to change; O = Openness; E = Emotionality; H = Honesty; LR = Left-right self-placement.
